# Supplementary material for: Early integration of pastoralism and millet cultivation in Bronze Age Eurasia
Source: Proc Biol Sci. 2019 Sep 4;286(1910):20191273. doi: 10.1098/rspb.2019.1273 (PMC6743000; doi:10.1098/rspb.2019.1273)
Supplement: Dataset S2 [file rspb20191273supp3.csv]

Taxon	Tissue	Specimen	d13C	Suess	TEF	d13C_diet	SI Reference
Broomcorn millet	Leaves	同心	-13.6	1.5		-12.1	[2]
Broomcorn millet	Leaves	会宁	-13.2	1.5		-11.7	[2]
Broomcorn millet	Leaves	灵台	-13.3	1.5		-11.8	[2]
Broomcorn millet	Leaves	崆峒	-14	1.5		-12.5	[2]
Broomcorn millet	Leaves	泾川	-13.3	1.5		-11.8	[2]
Broomcorn millet	Leaves	静宁	-14.4	1.5		-12.9	[2]
Broomcorn millet	Leaves	宁县	-13.6	1.5		-12.1	[2]
Broomcorn millet	Leaves	延长	-13.6	1.5		-12.1	[2]
Broomcorn millet	Leaves	华县	-14.6	1.5		-13.1	[2]
Broomcorn millet	Leaves	杨凌	-14.5	1.5		-13	[2]
Broomcorn millet	Leaves	靖边	-13.8	1.5		-12.3	[2]
Broomcorn millet	Leaves	榆次	-13.6	1.5		-12.1	[2]
Broomcorn millet	Leaves	岚县	-13.6	1.5		-12.1	[2]
Broomcorn millet	Leaves	隰县	-13.3	1.5		-11.8	[2]
Broomcorn millet	Leaves	乡宁	-13.4	1.5		-11.9	[2]
Broomcorn millet	Leaves	岢岚	-13.3	1.5		-11.8	[2]
Broomcorn millet	Leaves	保德	-14.1	1.5		-12.6	[2]
Saiga	hair	N3	-20.4	1.5	-5	-23.9	[6]
Saiga	hair	N5	-20.9	1.5	-5	-24.4	[6]
Saiga	hair	N7	-20.9	1.5	-5	-24.4	[6]
Saiga	hair	N8	-19.7	1.5	-5	-23.2	[6]
Saiga	hair	N11	-19.3	1.5	-5	-22.8	[6]
Saiga	hair	N13	-20.2	1.5	-5	-23.7	[6]
Saiga	hair	N14	-20.9	1.5	-5	-24.4	[6]
Saiga	hair	N17	-20.1	1.5	-5	-23.6	[6]
Saiga	hair	N18	-19.9	1.5	-5	-23.4	[6]
Saiga	hair	N20	-19.3	1.5	-5	-22.8	[6]
Saiga	hair	N228	-20.6	1.5	-5	-24.1	[6]
Saiga	hair	N1288	-20.9	1.5	-5	-24.4	[6]
Saiga	hair	N1804	-20.6	1.5	-5	-24.1	[6]
Saiga	hair	N1875	-20.7	1.5	-5	-24.2	[6]
Saiga	hair	N1876	-20.4	1.5	-5	-23.9	[6]
Saiga	hair	N1878	-20.6	1.5	-5	-24.1	[6]
Saiga	hair	N1984	-21.1	1.5	-5	-24.6	[6]
Saiga	hair	N1986	-20.8	1.5	-5	-24.3	[6]
Saiga	hair	N1987	-20.7	1.5	-5	-24.2	[6]
Saiga	hair	N1989	-20.9	1.5	-5	-24.4	[6]
Saiga	hair	N1991	-20.5	1.5	-5	-24	[6]
Saiga	hair	N1992	-20.9	1.5	-5	-24.4	[6]
Red deer	enamel	T184.1	-9.9		-14	-23.9	This study
Red deer	enamel	T184.2	-9.9		-14	-23.9	This study
Red deer	enamel	T184.3	-10		-14	-24	This study
Red deer	enamel	T184.4	-10.2		-14	-24.2	This study
Red deer	enamel	T184.5	-10.6		-14	-24.6	This study
Red deer	enamel	T127.1	-12		-14	-26	This study
Red deer	enamel	T127.2	-11.9		-14	-25.9	This study
Red deer	enamel	T127.3	-11.9		-14	-25.9	This study
Red deer	enamel	T127.4	-11.7		-14	-25.7	This study
Red deer	enamel	T127.5	-11.6		-14	-25.6	This study
Red deer	enamel	T127.6	-11.4		-14	-25.4	This study
Red deer	enamel	T127.7	-11.4		-14	-25.4	This study
Red deer	enamel	T127.8	-11.3		-14	-25.3	This study
Red deer	enamel	T127.9	-11.1		-14	-25.1	This study
Red deer	enamel	T127.10	-11		-14	-25	This study
Red deer	enamel	T127.11	-10.9		-14	-24.9	This study
Red deer	enamel	T127.12	-11.2		-14	-25.2	This study
Red deer	enamel	T127.13	-10.9		-14	-24.9	This study
Red deer	enamel	T127.14	-10.9		-14	-24.9	This study
Red deer	enamel	T127.15	-10.9		-14	-24.9	This study
Red deer	enamel	T127.16	-11		-14	-25	This study
Red deer	enamel	T127.17	-11.2		-14	-25.2	This study
Red deer	enamel	T129.1	-11.4		-14	-25.4	This study
Red deer	enamel	T129.2	-11.1		-14	-25.1	This study
Red deer	enamel	T129.3	-11.2		-14	-25.2	This study
Red deer	enamel	T129.4	-11.2		-14	-25.2	This study
Red deer	enamel	T129.5	-11.2		-14	-25.2	This study
Red deer	enamel	T129.6	-11		-14	-25	This study
Red deer	enamel	T129.7	-11		-14	-25	This study
Red deer	enamel	T129.8	-11.1		-14	-25.1	This study
Red deer	enamel	T129.9	-11.1		-14	-25.1	This study
Red deer	enamel	T129.10	-11		-14	-25	This study
Red deer	enamel	T129.11	-10.9		-14	-24.9	This study
Red deer	enamel	T129.12	-10.8		-14	-24.8	This study
Red deer	enamel	T129.13	-10.8		-14	-24.8	This study
Red deer	enamel	T129.14	-10.8		-14	-24.8	This study
Red deer	enamel	T130.1	-11.7		-14	-25.7	This study
Red deer	enamel	T130.2	-11.7		-14	-25.7	This study
Red deer	enamel	T130.3	-11.7		-14	-25.7	This study
Red deer	enamel	T130.4	-11.6		-14	-25.6	This study
Red deer	enamel	T130.5	-11.6		-14	-25.6	This study
Red deer	enamel	T130.6	-11.5		-14	-25.5	This study
Red deer	enamel	T130.7	-11.5		-14	-25.5	This study
Saiga	enamel	T191.1	-10.5		-14	-24.5	This study
Saiga	enamel	T191.2	-10.6		-14	-24.6	This study
Saiga	enamel	T192.1	-10.8		-14	-24.8	This study
Saiga	enamel	T192.2	-11.2		-14	-25.2	This study
Saiga	enamel	T192.3	-11.3		-14	-25.3	This study
Saiga	enamel	T192.4	-11.1		-14	-25.1	This study
Domesticated sheep	enamel	T020.1	-10.5	1.5	-14	-23	This study
Domesticated sheep	enamel	T020.2	-10.6	1.5	-14	-23.1	This study
Domesticated sheep	enamel	T020.3	-10.6	1.5	-14	-23.1	This study
Domesticated sheep	enamel	T020.4	-10.5	1.5	-14	-23	This study
Domesticated sheep	enamel	T020.5	-10.6	1.5	-14	-23.1	This study
Domesticated sheep	enamel	T020.6	-10.3	1.5	-14	-22.8	This study
Domesticated sheep	enamel	T020.7	-10.3	1.5	-14	-22.8	This study
Domesticated sheep	enamel	T020.8	-10.3	1.5	-14	-22.8	This study
Domesticated sheep	enamel	T020.9	-10.6	1.5	-14	-23.1	This study
Domesticated sheep	enamel	T020.10	-10.7	1.5	-14	-23.2	This study
Domesticated sheep	enamel	T020.11	-11	1.5	-14	-23.5	This study
Domesticated sheep	enamel	T020.12	-11.4	1.5	-14	-23.9	This study
Domesticated sheep	enamel	T020.13	-11.7	1.5	-14	-24.2	This study
Domesticated sheep	enamel	T020.14	-12	1.5	-14	-24.5	This study
Domesticated sheep	enamel	T020.15	-12.4	1.5	-14	-24.9	This study
Domesticated sheep	enamel	T020.16	-12.3	1.5	-14	-24.8	This study
Domesticated sheep	enamel	T020.17	-12	1.5	-14	-24.5	This study
Domesticated sheep	enamel	T020.18	-11.7	1.5	-14	-24.2	This study
Domesticated sheep	enamel	T020.19	-11.3	1.5	-14	-23.8	This study
Domesticated sheep	enamel	T020.20	-11.1	1.5	-14	-23.6	This study
Domesticated sheep	enamel	T020.21	-10.8	1.5	-14	-23.3	This study
Domesticated sheep	enamel	T021.1	-10.9	1.5	-14	-23.4	This study
Domesticated sheep	enamel	T021.2	-10.9	1.5	-14	-23.4	This study
Domesticated sheep	enamel	T021.3	-10.9	1.5	-14	-23.4	This study
Domesticated sheep	enamel	T021.4	-11	1.5	-14	-23.5	This study
Domesticated sheep	enamel	T021.5	-11.2	1.5	-14	-23.7	This study
Domesticated sheep	enamel	T021.6	-11.6	1.5	-14	-24.1	This study
Domesticated sheep	enamel	T021.7	-11.5	1.5	-14	-24	This study
Domesticated sheep	enamel	T021.8	-11.8	1.5	-14	-24.3	This study
Domesticated sheep	enamel	T021.9	-12	1.5	-14	-24.5	This study
Domesticated sheep	enamel	T021.10	-12.1	1.5	-14	-24.6	This study
Domesticated sheep	enamel	T021.11	-12.2	1.5	-14	-24.7	This study
Domesticated sheep	enamel	T021.12	-12.1	1.5	-14	-24.6	This study
Domesticated sheep	enamel	T021.13	-12.1	1.5	-14	-24.6	This study
Domesticated sheep	enamel	T021.14	-11.9	1.5	-14	-24.4	This study
Domesticated sheep	enamel	T021.15	-11.6	1.5	-14	-24.1	This study
Domesticated sheep	enamel	T021.16	-11.4	1.5	-14	-23.9	This study
Domesticated sheep	enamel	T021.17	-11.2	1.5	-14	-23.7	This study
Domesticated sheep	enamel	T157.1	-11.6	1.5	-14	-24.1	This study
Domesticated sheep	enamel	T157.2	-11.5	1.5	-14	-24	This study
Domesticated sheep	enamel	T157.3	-11.4	1.5	-14	-23.9	This study
Domesticated sheep	enamel	T157.4	-11.2	1.5	-14	-23.7	This study
Domesticated sheep	enamel	T157.5	-10.9	1.5	-14	-23.4	This study
Domesticated sheep	enamel	T157.6	-10.7	1.5	-14	-23.2	This study
Domesticated sheep	enamel	T157.7	-10.5	1.5	-14	-23	This study
Domesticated sheep	enamel	T157.8	-10.5	1.5	-14	-23	This study
Domesticated sheep	enamel	T157.9	-11.3	1.5	-14	-23.8	This study
Domesticated sheep	enamel	T157.10	-11.9	1.5	-14	-24.4	This study
Domesticated sheep	enamel	T157.11	-12.4	1.5	-14	-24.9	This study
Domesticated sheep	enamel	T157.12	-12.6	1.5	-14	-25.1	This study
Domesticated sheep	enamel	T157.13	-12.2	1.5	-14	-24.7	This study
Siberian ibex	collagen	5999	-18.8		-5	-23.8	This study
Siberian ibex	collagen	BG0117	-18.9		-5	-23.9	This study
Red deer	collagen	BG0036	-18.8		-5	-23.8	This study
Red deer	collagen	BG0035	-19.7		-5	-24.7	This study
Red deer	collagen	BG0067	-18.2		-5	-23.2	This study
Red deer	collagen	BG0056	-18.5		-5	-23.5	This study
Red deer	collagen	BG0063	-20.1		-5	-25.1	This study
Red deer	collagen	BG0086	-18.3		-5	-23.3	This study
Red deer	collagen	BG0079	-19.1		-5	-24.1	This study
Red deer	collagen	BG0064	-18.6		-5	-23.6	This study
Red deer	collagen	BG0043	-18		-5	-23	This study
Red deer	collagen	BG0103	-19.3		-5	-24.3	This study
Red deer	collagen	BG0152	-18.6		-5	-23.6	This study
Red deer	collagen	BG0153	-18.8		-5	-23.8	This study
Red deer	collagen	BG0165	-19.4		-5	-24.4	This study
Red deer	collagen	BG0199	-18.4		-5	-23.4	This study
Red deer	collagen	BG0245	-19		-5	-24	This study
Red deer	collagen	BG0262	-19.4		-5	-24.4	This study
Red deer	collagen	BG0277	-19		-5	-24	This study
Red deer	collagen	BG0285	-19.3		-5	-24.3	This study
Red deer	collagen	BG0288	-17.7		-5	-22.7	This study
Red deer	collagen	BG0304_3	-19.1		-5	-24.1	This study
Steppe tortoise	collagen	8178	-25.89	1.5	-1	-25.4	This study
Steppe tortoise	collagen	8179	-24.89	1.5	-1	-24.4	This study
Steppe tortoise	collagen	8180	-25.32	1.5	-1	-24.8	This study
Steppe tortoise	collagen	8181	-24.86	1.5	-1	-24.4	This study
Steppe tortoise	collagen	8182	-24.55	1.5	-1	-24.1	This study
Steppe tortoise	collagen	8183	-25.25	1.5	-1	-24.7	This study
