# Supplementary material for: Early integration of pastoralism and millet cultivation in Bronze Age Eurasia
Source: Proc Biol Sci. 2019 Sep 4;286(1910):20191273. doi: 10.1098/rspb.2019.1273 (PMC6743000; doi:10.1098/rspb.2019.1273)
Supplement: Dataset S4 [file rspb20191273supp5.csv]

ID	site	period	taxon	element	d13C	d15N	percentC	percentN	cn
BG0001	Begash	1a	cattle	fe	-19.05	8.05	44.39	17.42	2.97
BG0002	Begash	1a	caprine	ti	-11.63	8.55	45.85	16.91	3.16
BG0003	Begash	1a	cattle	ul	-18.4	6.87	45.91	17.16	3.12
BG0005	Begash	1a	caprine	man	-13.08	9.39	44.97	16.69	3.14
BG0006	Begash	1a	caprine	ra	-19.43	7.03	46.46	16.76	3.23
BG0007	Begash	1a	caprine	ul	-16.65	7.48	45.71	16.96	3.14
BG0008	Begash	1a	caprine	mc	-17.35	7.93	46.24	16.8	3.21
BG0009	Begash	1a	caprine	ra	-15.63	7.64	46.16	17.05	3.16
BG0010	Begash	1a	caprine	sc	-17.8	6.24	46.44	16.93	3.2
BG0011	Begash	1a	cattle	ri	-17.56	8.16	45.44	16.86	3.14
BG0012	Begash	1a	caprine	ra	-17.94	6.89	46.09	17.04	3.15
BG0013	Begash	1a	caprine	ra	-16.81	8.58	46.4	16.77	3.23
BG0014	Begash	1a	caprine	sc	-14.88	9	44.97	16.22	3.24
BG0016	Begash	1a	cattle	mc	-18.18	7.54	46.89	17.16	3.19
BG0017	Begash	1a	caprine	mt	-12	10.42	45.21	17	3.1
BG0018	Begash	1a	cattle	p2	-19.4	7.9	46.44	17.01	3.19
BG0019	Begash	1a	caprine	mc	-19.17	5.55	45.54	16.8	3.16
BG0020	Begash	1a	cattle	mt	-18.93	4.45	45.04	17.41	3.02
BG0021	Begash	1a	caprine	ri	-18.39	5.01	45.65	16.83	3.16
BG0022	Begash	1a	cattle	cra	-18.49	6.15	45.24	17.08	3.09
BG0023	Begash	1a	caprine	man	-16	7	45.75	17	3.14
BG0024	Begash	1a	cattle	ra	-18.62	7.38	46.12	16.94	3.18
BG0025	Begash	1a	caprine	mc	-18.55	5.45	46.24	16.85	3.2
BG0027	Begash	1a	caprine	mt	-17.74	6.62	46.09	17.03	3.16
BG0029	Begash	1a	caprine	hu	-12.37	13.3	44.06	17.35	2.96
BG0031	Begash	1a	caprine	ra	-17.61	7.25	46.04	17	3.16
BG0032	Begash	1a	cattle	car	-18.86	7.48	46.32	17.01	3.18
BG0033	Begash	1a	caprine	hu	-17.89	6.71	45.83	16.84	3.18
BG0034	Begash	1a	cattle	sc	-17.7	8.91	44.47	17.49	2.97
BG0035	Begash	1a	red deer	fe	-19.67	5.57	45.72	17.17	3.11
BG0036	Begash	1a	red deer	vcv	-18.77	6.76	44.7	16.64	3.13
BG0037	Begash	1a	caprine	man	-16.67	7.03	46.69	17.23	3.16
BG0038	Begash	1a	cattle	car	-18.24	8.09	45.71	17.1	3.12
BG0040	Begash	1a	caprine	hu	-17.95	9.03	44.23	17.44	2.96
BG0041	Begash	1a	caprine	hu	-18.47	5.52	45.41	16.94	3.13
BG0041a	Begash	1a	caprine	ri	-19.26	8.51	45	16.61	3.16
BG0042	Begash	1b	cattle	man	-16.83	8.94	45.5	17.2	3.09
BG0043	Begash	1b	red deer	max	-17.97	5.85	44.68	17.64	2.95
BG0044	Begash	1b	cattle	cal	-19.4	7.39	45.41	17.38	3.05
BG0045	Begash	1b	caprine	sc	-15.08	8.79	45.06	17.41	3.02
BG0048	Begash	1b	caprine	ti	-18.37	7.83	45.19	17.19	3.07
BG0049	Begash	1b	caprine	ra	-19.05	6.43	45.59	17.54	3.03
BG0052	Begash	1b	cattle	hu	-19.62	6.02	46.03	17.5	3.07
BG0053	Begash	1b	caprine	hu	-15.26	10.15	45.07	17.3	3.04
BG0054	Begash	1b	cattle	ri	-16.47	7.61	45.02	17.65	2.98
BG0055	Begash	1b	caprine	ti	-19.31	6.47	44.77	17.69	2.95
BG0056	Begash	1b	red deer	ra	-18.47	6.48	45.28	17.32	3.05
BG0057	Begash	1b	cattle	mp	-18.94	7.69	45.1	17.76	2.96
BG0058	Begash	1b	cattle	vcv	-19.09	7.1	45.24	17.25	3.06
BG0060	Begash	1b	caprine	ti	-18.94	10.65	45.24	17.3	3.05
BG0063	Begash	1b	red deer	fe	-20.08	3.84	45.21	17.39	3.03
BG0064	Begash	1b	red deer	mt	-18.63	5.99	44.26	17.52	2.95
BG0066	Begash	1b	caprine	mp	-17.68	7.51	45.08	17.47	3.01
BG0067	Begash	1b	red deer	ul	-18.19	4.69	44.48	16.97	3.06
BG0068	Begash	1b	cattle	ra	-17.6	7.86	45.1	17.61	2.99
BG0069	Begash	1b	caprine	ra	-18.42	7.15	45.07	17.16	3.06
BG0070	Begash	1b	cattle	fe	-18.55	4.87	45.09	16.84	3.12
BG0071	Begash	1b	cattle	p2	-18.77	6.63	44.67	17.16	3.04
BG0073	Begash	1b	caprine	ri	-18.43	4.72	45.05	17.77	2.96
BG0074	Begash	1b	cattle	p1a	-19.57	6.37	46.08	17.47	3.08
BG0075	Begash	1b	caprine	ti	-18.85	7.58	45.67	17.5	3.05
BG0076	Begash	1b	caprine	hu	-17.69	6.24	44.93	17.72	2.96
BG0077	Begash	1b	caprine	ra	-16.34	8.41	46.01	17.92	3
BG0078	Begash	1b	caprine	hu	-17.87	8.53	45.6	17.16	3.1
BG0079	Begash	1b	red deer	mc	-19.12	6.93	44.93	17.83	2.94
BG0080	Begash	1b	cattle	hu	-18.31	6.87	44.78	17.57	2.97
BG0082	Begash	1b	caprine	cal	-17.52	6.67	45.81	17.23	3.1
BG0083	Begash	1b	caprine	mt	-19.25	4.67	45.37	17.17	3.08
BG0084	Begash	1b	caprine	ra	-15.19	7.99	45.06	17.37	3.03
BG0085	Begash	1b	caprine	sc	-17	8.7	44.66	17.67	2.95
BG0086	Begash	1b	red deer	fe	-18.26	6.98	45.93	17.23	3.11
BG0087	Begash	1b	cattle	sc	-19.23	6.63	45.81	17.41	3.07
BG0088	Begash	1b	cattle	ri	-18.78	8.7	45.41	18.02	2.94
BG0089	Begash	1b	caprine	pe	-18.84	7.87	46.01	17.34	3.1
BG0090	Begash	1b	caprine	mt	-16.25	8.78	44.4	17.69	2.93
BG0094	Begash	1b	cattle	ti	-19.18	7.15	45.37	17.33	3.05
BG0095	Begash	1b	caprine	ti	-18.77	6.37	44.89	17.54	2.99
BG0096	Begash	1b	caprine	mt	-18.88	6.61	45.91	17.31	3.09
BG0097	Begash	1b	caprine	man	-18.65	7.84	46.34	18.09	2.99
BG0098	Begash	1b	caprine	sc	-18.5	6.21	45.48	17.26	3.07
BG0099	Begash	1b	caprine	ti	-19.06	7.12	45.57	17.52	3.03
BG0100	Begash	1b	caprine	ul	-18.12	5.68	44.53	17.41	2.98
BG0101	Begash	1b	cattle	ra	-18.15	7.19	44.99	17.31	3.03
BG0102	Begash	1b	cattle	vl	-18.21	7.42	44.46	16.97	3.06
BG0103	Begash	1b	red deer	vcv	-19.25	7.54	45.76	17.94	2.98
BG0104	Begash	1b	cattle	ti	-16.99	9.23	45.94	17.41	3.08
BG0105	Begash	1b	caprine	ra	-17.58	8.07	44.98	17.87	2.94
BG0107	Begash	1b	caprine	hu	-15.49	8.45	46.03	17.34	3.1
BG0108	Begash	1b	caprine	ta	-18.34	7.28	44.8	17.42	3
BG0109	Begash	1b	cattle	sc	-19.66	6.37	46.07	17.41	3.09
BG0110	Begash	1b	caprine	ti	-19.28	10.07	45.6	17.26	3.08
BG0112	Begash	1b	caprine	ra	-18.37	7.42	44.83	17.52	2.99
BG0113	Begash	1b	caprine	hz	-17.51	6.27	45.59	17.18	3.1
BG0114	Begash	1b	caprine	cal	-18.48	6.35	45.12	17.64	2.98
BG0115	Begash	1b	cattle	sc	-18.38	6.64	44.53	17.14	3.03
BG0116	Begash	1b	caprine	cal	-18.46	6.69	44.77	17.62	2.96
BG0117	Begash	1b	ibex	pe	-18.9	6.85	46.29	18.18	2.97
BG0118	Begash	2	caprine	sc	-19.35	9.59	46.59	16.93	3.21
BG0119	Begash	2	caprine	mt	-19.19	5.99	46.53	17.08	3.18
BG0120	Begash	2	cattle	p2p	-18.86	6.53	35.45	12.79	3.23
BG0121	Begash	2	caprine	cra	-19.17	6.79	46.07	16.88	3.18
BG0124	Begash	2	cattle	ti	-19.89	6.87	45.82	17.11	3.13
BG0127	Begash	2	caprine	ti	-19.15	7.85	45.1	16.72	3.15
BG0128	Begash	2	caprine	sc	-18.08	7.46	46.19	17.32	3.11
BG0129	Begash	2	cattle	pe	-18.39	8.15	46.27	17.41	3.1
BG0130	Begash	2	cattle	hu	-18.74	8.58	45.78	17.11	3.12
BG0131	Begash	2	caprine	hu	-18.42	7.44	42.36	17.38	2.84
BG0133	Begash	2	caprine	sc	-18.77	7.54	45.95	16.82	3.19
BG0134	Begash	2	cattle	man	-17.67	10.39	42.15	17.09	2.88
BG0135	Begash	2	caprine	cal	-18.38	7.92	41.58	16.88	2.87
BG0136	Begash	2	cattle	ul	-18.88	6.57	45.39	17.49	3.03
BG0138	Begash	2	caprine	vt	-16.54	7.23	44.95	17.33	3.03
BG0140	Begash	2	cattle	cra	-17.43	10.12	42	17.33	2.83
BG0142	Begash	2	cattle	p1p	-19.37	6.61	43.13	17.48	2.88
BG0143	Begash	2	caprine	ra	-17.73	6.61	42.61	17.28	2.88
BG0144	Begash	2	caprine	p1	-17.9	7.01	42.64	17.38	2.86
BG0145	Begash	2	caprine	p1	-18.76	7	41.9	17.33	2.82
BG0146	Begash	2	cattle	ra	-18.8	6.29	42.14	17.46	2.82
BG0147	Begash	2	caprine	hu	-19.22	8.2	41.76	17.31	2.81
BG0149	Begash	2	caprine	ul	-17.69	7.91	42.35	17.48	2.83
BG0150	Begash	2	caprine	ti	-18.92	7.25	42.5	17.39	2.85
BG0151	Begash	2	cattle	sc	-17.15	7.94	46.08	17.23	3.12
BG0152	Begash	2	red deer	p1	-18.58	5.06	45.13	17.53	3
BG0153	Begash	2	red deer	mp	-18.8	7.78	43.74	16.15	3.16
BG0154	Begash	2	caprine	sc	-17.77	6.6	45.54	17.7	3
BG0155	Begash	2	cattle	man	-19.1	7.38	45.91	16.84	3.18
BG0156	Begash	2	cattle	ti	-17.86	9.33	44.67	17.52	2.97
BG0157	Begash	2	caprine	sc	-18.66	6.27	45.28	16.76	3.15
BG0159	Begash	2	cattle	p1p	-19.03	7	45.79	17.01	3.14
BG0160	Begash	2	cattle	man	-16.41	8.63	44.69	17.27	3.02
BG0161	Begash	2	caprine	man	-18.58	7.8	45.39	16.78	3.16
BG0163	Begash	2	caprine	man	-17.46	6.54	45.91	17.1	3.13
BG0164	Begash	2	caprine	ti	-17.87	6.95	44.87	17.22	3.04
BG0165	Begash	2	red deer	cal	-19.41	5.95	45.69	16.91	3.15
BG0167	Begash	2	cattle	ra	-19.28	9.48	46.18	17.01	3.17
BG0168	Begash	2	caprine	ti	-18.83	6.13	45.12	17.52	3
BG0170	Begash	2	caprine	man	-17.6	9.36	45.31	16.61	3.18
BG0172	Begash	2	cattle	cal	-19.47	6.47	45.61	16.88	3.15
BG0173	Begash	2	caprine	hu	-17.87	9.25	45.11	17.25	3.05
BG0175	Begash	2	caprine	ti	-18.96	7.81	44.99	17.37	3.02
BG0176	Begash	2	wild sheep	hu	-18.47	6.63	46.23	16.95	3.18
BG0177	Begash	2	cattle	sc	-19.59	10.3	45.14	17.45	3.02
BG0178	Begash	2	caprine	ta	-19.34	7.31	46.83	16.95	3.22
BG0181	Begash	2	caprine	ta	-18.63	8.38	46.62	16.9	3.22
BG0182	Begash	2	cattle	man	-17.4	9.94	46.2	16.97	3.18
BG0183	Begash	2	caprine	ti	-18.76	7.66	46.41	16.94	3.2
BG0184	Begash	2	caprine	man	-18.33	8.03	46.68	16.99	3.21
BG0185	Begash	2	caprine	p1	-18.44	7.46	46.36	16.79	3.22
BG0186	Begash	2	caprine	ra	-19.06	6.52	46.76	16.93	3.22
BG0187	Begash	2	cattle	ra	-17.98	8.51	44.81	17.44	3
BG0189	Begash	2	caprine	hu	-19.07	7.17	44.84	17.11	3.06
BG0191	Begash	2	caprine	sc	-18.56	7.69	45.23	17.38	3.04
BG0192	Begash	2	cattle	hu	-17.26	9.78	46.61	16.99	3.2
BG0194	Begash	2	caprine	mc	-18.93	9.13	45.81	16.76	3.19
BG0196	Begash	2	caprine	man	-18.76	6.91	41.96	17.41	2.81
BG0197	Begash	3a	cattle	hu	-18.83	10.74	42.04	17.39	2.82
BG0198	Begash	3a	red deer	ra	-19.19	5.05	42.1	17.41	2.82
BG0199	Begash	3a	red deer	mc	-18.37	6.63	41.83	17.07	2.86
BG0203	Begash	3a	cattle	vt	-18.37	8.17	41.19	17.17	2.8
BG0204	Begash	3a	caprine	ti	-18.46	6.69	41.8	17.47	2.79
BG0205	Begash	3a	cattle	sc	-18.86	4.7	41.4	17.38	2.78
BG0206	Begash	3a	caprine	vcv	-16.44	8.25	41.55	17.5	2.77
BG0207	Begash	3a	caprine	ta	-18.77	8.32	41.68	17.62	2.76
BG0208	Begash	3a	cattle	mc	-16.53	9.77	41.72	17.75	2.74
BG0210	Begash	3a	caprine	man	-19.41	6.21	41.1	17.15	2.8
BG0211	Begash	3a	cattle	max	-18.96	7.54	42.39	17.62	2.81
BG0212	Begash	3a	caprine	ti	-19.82	5.68	42.75	17.63	2.83
BG0213	Begash	3a	caprine	mc	-18.46	7.12	41.52	17.61	2.75
BG0214	Begash	3a	caprine	ta	-19.13	6.92	42.46	17.4	2.85
BG0215	Begash	3a	wild sheep	mt	-17.13	5.63	41.71	17.71	2.75
BG0216	Begash	3a	red deer	gew	-18.45	3.82	41.42	17.72	2.73
BG0217	Begash	3a	cattle	ri	-18.75	6.19	41.92	17.67	2.77
BG0219	Begash	3a	caprine	hu	-18.44	8.1	41.67	17.59	2.76
BG0220	Begash	3a	cattle	ri	-19.28	9.14	41.86	17.52	2.79
BG0222	Begash	3a	cattle	ri	-19.62	5.54	41.76	17.7	2.75
BG0223	Begash	3a	caprine	man	-17.86	7.7	41.49	17.5	2.77
BG0224	Begash	3a	caprine	ri	-19.03	6.89	42.72	17.39	2.87
BG0225	Begash	3a	caprine	p2	-18.74	6.58	41.93	17.69	2.77
BG0226	Begash	3a	cattle	mt	-18.98	6.9	41.84	17.6	2.77
BG0228	Begash	3a	caprine	ri	-17.27	8.07	42.97	17.59	2.85
BG0229	Begash	3b	caprine	ra	-19.05	4.06	42.16	17.34	2.84
BG0230	Begash	3b	caprine	ti	-19.11	5.67	42.04	17.48	2.81
BG0231	Begash	3b	cattle	fe	-17.83	9.29	42.41	17.64	2.8
BG0234	Begash	3b	cattle	ti	-19.56	6.42	42.14	17.64	2.79
BG0236	Begash	3b	red deer	man	-18.56	5.26	41.64	17.15	2.83
BG0237	Begash	3b	red deer	mc	-18.92	5.16	41.95	17.54	2.79
BG0238	Begash	3b	red deer	p1	-18.73	4.88	41.59	17.56	2.76
BG0239	Begash	3b	caprine	cal	-19.02	7.16	41.6	17.51	2.77
BG0240	Begash	3b	caprine	ti	-17.89	7.87	41.41	17.43	2.77
BG0241	Begash	3b	caprine	ra	-18.95	5.2	41.27	17.49	2.75
BG0242	Begash	3b	caprine	p1	-18.75	7.94	41.16	17.55	2.74
BG0243	Begash	3b	cattle	ti	-20.24	4.89	41.92	17.74	2.76
BG0244	Begash	3b	red deer	pe	-19.11	5.24	41.39	17.31	2.79
BG0245	Begash	3b	red deer	cen	-19.03	4.34	42.35	17.22	2.87
BG0246	Begash	3b	caprine	hu	-18.75	7.36	42.13	17.13	2.87
BG0247	Begash	3b	caprine	hu	-17.74	6.31	42.2	16.96	2.9
BG0250	Begash	3b	cattle	fe	-13.8	7.17	42.25	17.18	2.87
BG0251	Begash	3b	caprine	cal	-18.95	5.78	42.03	17.19	2.85
BG0253	Begash	3b	caprine	mt	-17.92	7.81	42.38	17.19	2.88
BG0254	Begash	3b	caprine	p1	-18.53	8.07	42.48	17.69	2.8
BG0255	Begash	3b	cattle	mt	-18.84	4.81	41.51	17.2	2.82
BG0256	Begash	3b	caprine	ti	-18.58	6.58	41.5	17.35	2.79
BG0257	Begash	3b	caprine	fe	-19.14	6.63	41.82	17.15	2.84
BG0259	Begash	3b	cattle	man	-18.95	7.08	41.93	17.31	2.83
BG0261	Begash	3b	red deer	hu	-18.59	4.61	41.7	17.32	2.81
BG0262	Begash	3b	red deer	car	-19.39	5.36	42.21	17.24	2.86
BG0263	Begash	3b	caprine	man	-18.88	6.22	41.72	17.25	2.82
BG0264	Begash	3b	caprine	man	-17.77	7.81	41.82	17.29	2.82
BG0265	Begash	3b	caprine	p1	-17.77	8.32	42.18	17.58	2.8
BG0266	Begash	3b	caprine	hu	-19.02	9.24	42.7	17.34	2.87
BG0269	Begash	3b	caprine	man	-17.52	8.46	41.49	17.14	2.82
BG0271	Begash	3b	caprine	man	-18.56	6.8	39.6	17.58	2.63
BG0273	Begash	3b	caprine	fe	-18.95	6.05	41.91	17.37	2.81
BG0274	Begash	3b	caprine	sc	-19.52	7.52	41.96	17.3	2.83
BG0275	Begash	3b	caprine	ra	-16.89	9.69	42.34	17.46	2.83
BG0276	Begash	3b	cattle	ti	-18.47	8.54	42.09	17.35	2.83
BG0277	Begash	3b	red deer	p3	-19.03	4.13	41.24	16.88	2.85
BG0279	Begash	3b	caprine	hu	-17.68	7.82	42.15	17.47	2.82
BG0281	Begash	3b	caprine	mc	-17.94	7.6	42.35	17.48	2.83
BG0282	Begash	3b	cattle	p3	-17.14	7.95	40.18	16.6	2.82
BG0283	Begash	3b	caprine	ti	-17.82	8.78	41.82	17.22	2.83
BG0284	Begash	3b	cattle	sc	-18.27	8.22	42.04	17.35	2.83
BG0285	Begash	3b	red deer	p3	-19.27	5.71	41.97	15.95	3.07
BG0286	Begash	3b	caprine	mt	-17.91	5.31	42.43	16.12	3.07
BG0288	Begash	3b	cattle	mc	-17.72	11.97	40.64	15.79	3
BG0290	Begash	3b	caprine	sc	-18.51	7.55	42.36	16.11	3.07
BG0291	Begash	3b	cattle	ti	-19	8.76	42.36	16.28	3.04
BG0293	Begash	3b	cattle	ri	-17.45	9.63	42.16	16.12	3.05
BG0294	Begash	3b	caprine	hu	-17.29	9.54	42.54	16.22	3.06
BG0295	Begash	3b	caprine	man	-17.67	9.97	42.48	16.14	3.07
BG0299	Begash	3b	caprine	p1	-18.92	9.85	41.95	16	3.06
BG0300	Begash	3b	cattle	hu	-19.21	8.08	42.25	16.19	3.04
BG0302	Begash	3b	cattle	mc	-18.14	8.66	42.69	16.35	3.04
BG0303	Begash	3b	caprine	cal	-19.31	7.54	42.38	16.33	3.03
BG0304_3	Begash	3b	red deer	p1	-19.07	4.42	46.72	17.41	3.13
TRH-62	Begash	2	caprine	man	-19.21	8.83	48.23	17.7	3.18
TRH-67	Begash	3b	caprine	man	-16.8	7.49	46.63	17.36	3.13
4034	Dali	1	caprine	ra	-16.02	9.16	44.05	15.44	3.33
4036	Tasbas	2b	caprine	man	-18.53	9.43	43.74	15.53	3.28
4037	Dali	1	cattle	hu	-19.04	8.24	44.8	15.86	3.3
4038	Dali	2	caprine	max	-18.99	7.86	43.85	15.62	3.28
4039	Dali	1	cattle	max	-12.6	8.94	42	14.24	3.44
4040	Dali	2	caprine	ra	-17.68	7.43	43.58	15.37	3.31
4041	Dali	1	cattle	max	-18.97	7.83	45.75	15.96	3.34
4043	Dali	2	caprine	hu	-18.12	6.68	44.4	15.71	3.3
4044	Dali	2	caprine	man	-18.4	7.93	44.77	15.64	3.34
4045	Dali	1	cattle	cra	-17.28	7.67	44.61	15.86	3.28
4046	Dali	1	cattle	mt	-17.47	7.8	46.43	16.48	3.29
4047	Dali	1	caprine	ra	-19.14	8.16	43.63	15.65	3.25
4048	Dali	1	cattle	mt	-18.8	7.38	43.46	15.8	3.21
4049	Dali	1	caprine	man	-17.06	8.42	44.97	15.51	3.38
4050	Tasbas	2b	caprine	man	-17.64	7.27	44.24	15.8	3.27
4051	Dali	2	cattle	max	-18.03	8.98	44.38	15.81	3.28
4052	Tasbas	2b	caprine	man	-15.88	7.83	44.58	15.67	3.32
4053	Dali	2	red deer	ph1	-24.68	9.87	40.09	6.77	6.91
4054	Dali	2	caprine	max	-18.7	7.32	45.27	15.71	3.36
4055	Dali	2	ibex	cra	-18.66	3.82	46	16.15	3.32
6967	Dali	2	caprine	man	-17.31	7.94	48.39	17.73	3.18
5999	Dali	1	caprine	man	-18.77	6.48	44.55	16.83	3.09
6974	Dali	2	homo	hu	-14.22	12.34	43.91	16.45	3.11
6963	Begash	2	homo	ul	-15.16	12.04	45.18	16.68	3.16
6964	Begash	3a	homo	ul	-15.02	13.41	47.4	17.72	3.12
6056	Dali	1	homo	cra	-17.6	12.76	45.86	18.04	2.97
8178	Saryesik-Atryan	modern	tortoise	plastron	-25.89	8.63	46.65	14.98	3.63
8179	Saryesik-Atryan	modern	tortoise	plastron	-24.89	12.19	49.06	16.77	3.41
8180	Saryesik-Atryan	modern	tortoise	plastron	-25.32	12.5	48.26	15.7	3.59
8181	Saryesik-Atryan	modern	tortoise	plastron	-24.86	9.59	49.42	16.73	3.45
8182	Saryesik-Atryan	modern	tortoise	plastron	-24.55	9.47	49.22	16.19	3.55
8183	Saryesik-Atryan	modern	tortoise	plastron	-25.25	6.91	45.61	14.98	3.55
